# Supplementary material for: Regulation of Epithelial Stem Cell Replacement and Follicle Formation in the Drosophila Ovary
Source: Oxford University Press journal article supplement (doi:10.1534/genetics.109.109538), 2009-12-01
Supplement: figures1.pdf [file figures1.pdf]

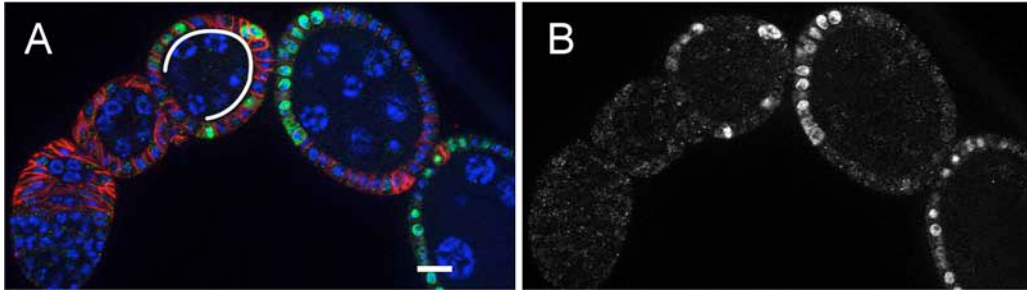

FIGURE S1.—An FSC loss event in which the youngest labeled follicle cells were posterior-biased. Panel A shows the merged image and panel B shows the clonal marker ( $\beta$ -galactosidase) only. Curved white line indicates the approximate position and shape of the posterior-biased clone. Ommatidia were stained with anti-FasIII (red), anti- $\beta$ -galactosidase (green) and DAPI (blue). Scale bar is 10 $\mu$ m.
