# Supplementary material for: Regulation of Epithelial Stem Cell Replacement and Follicle Formation in the Drosophila Ovary
Source: Oxford University Press journal article supplement (doi:10.1534/genetics.109.109538), 2009-12-01
Supplement: figures2.pdf [file figures2.pdf]

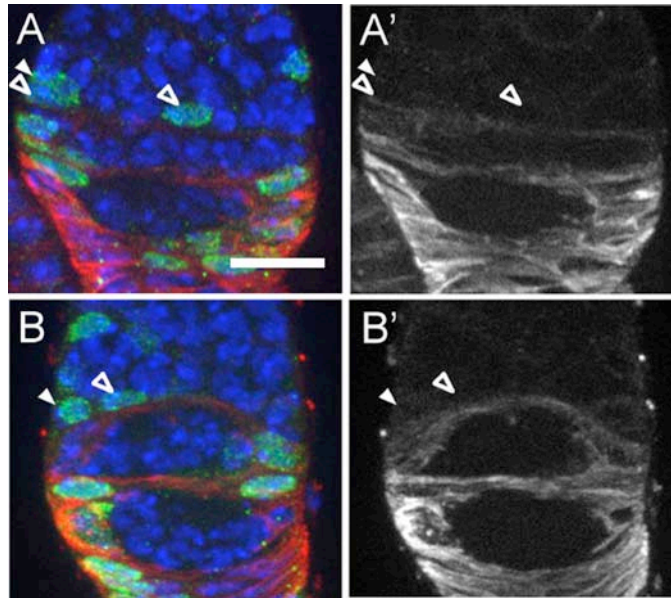

FIGURE S2.—FSC clones, 8 dphs stained with anti  $\beta$ -galactosidase (green, the clonal marker) and anti-FasIII. Solid triangles indicate a labeled FSC with low FasIII staining and open triangles indicate FSC daughters with low FasIII staining. In panel A, the left open triangle indicates a FSC daughter that is likely a pmc, while the right open triangle in panel A and the open triangle in panel B indicate FSC daughters that are likely cmcs. Panels A' and B' show the red (FasIII) channel only. Scale bar is 10  $\mu$ m.
